# Supplementary figures and images for: Responses of Forest Net Primary Productivity to Climatic Factors in China during 1982–2015
Source: MDPI journal article supplement (doi:10.3390/plants11212932), 2022-10-31

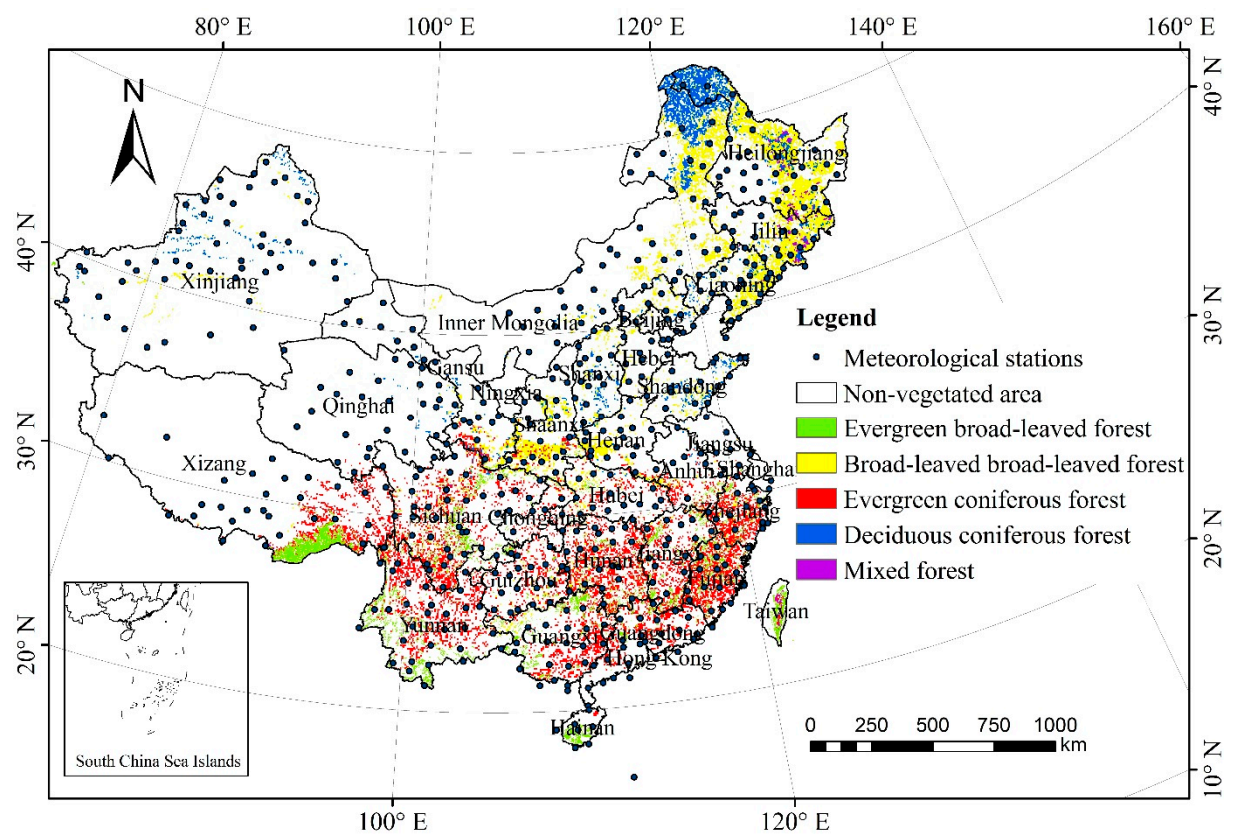

Figure S1 China's forest distribution and meteorological stations

Supplement: s1 [file s1]
